# Supplementary material for: The Structural Characteristics of Collagen in Swim Bladders with 25-Year Sequence Aging: The Impact of Age
Source: MDPI journal article supplement (doi:10.3390/app11104578), 2021-05-17
Supplement: s1 [file s1]

# Supplementary Materials: The Structural Characteristics of Collagen in Swim Bladders with 25-Year Sequence Aging: The Impact of Age

Xiaofeng He, Liling Xie, Xiaoshan Zhang, Fan Lin, Xiaobo Wen and Bo Teng

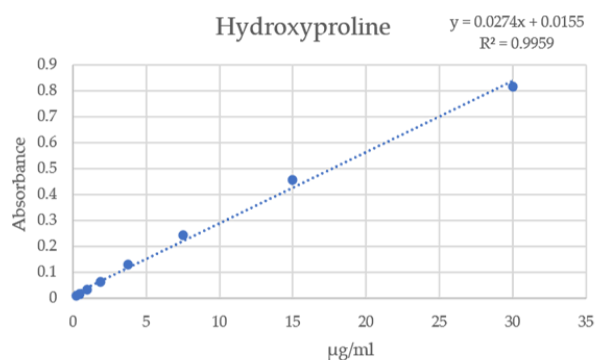

**Figure S1.** Standard curve used to calculate hydroxyproline concentration which was used to calculate the collagen concentration.

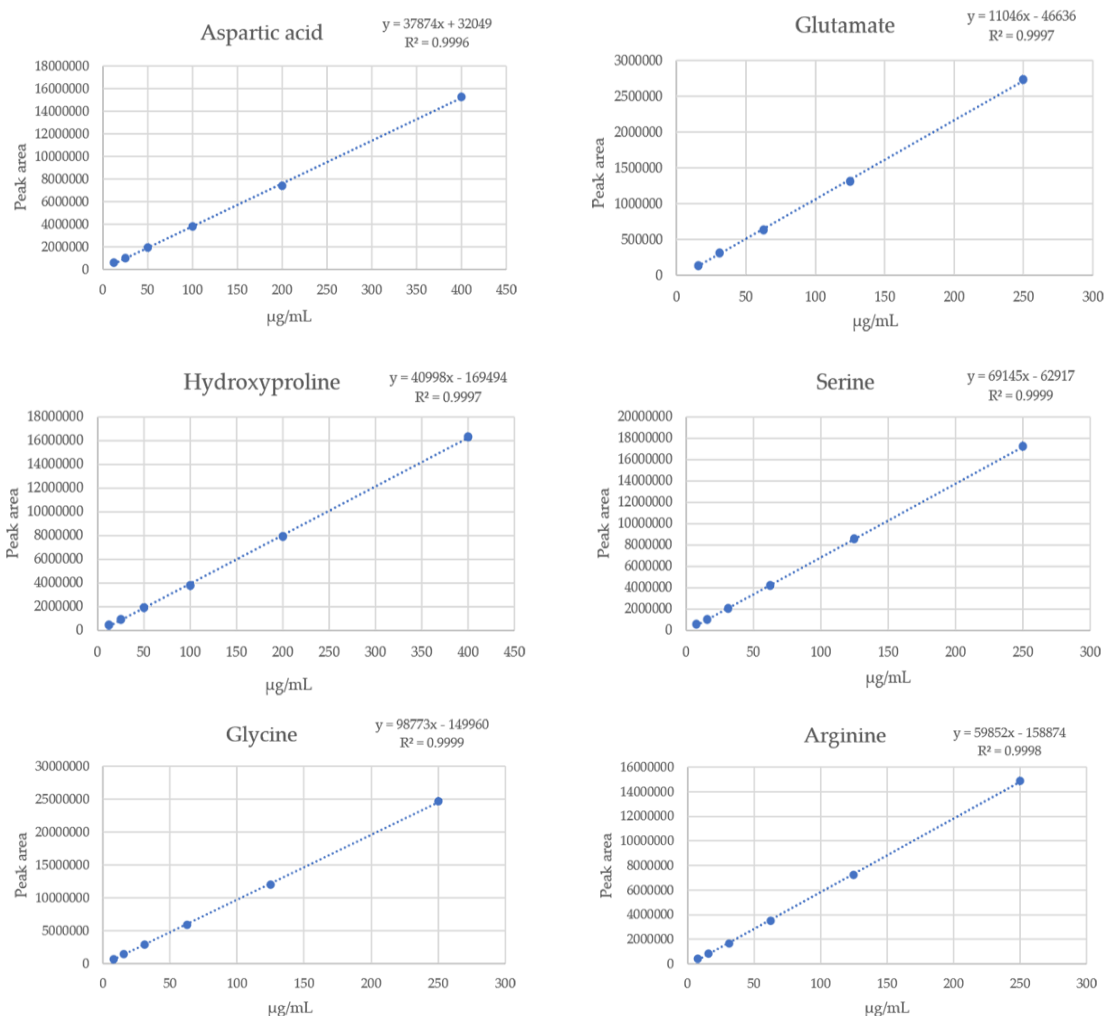

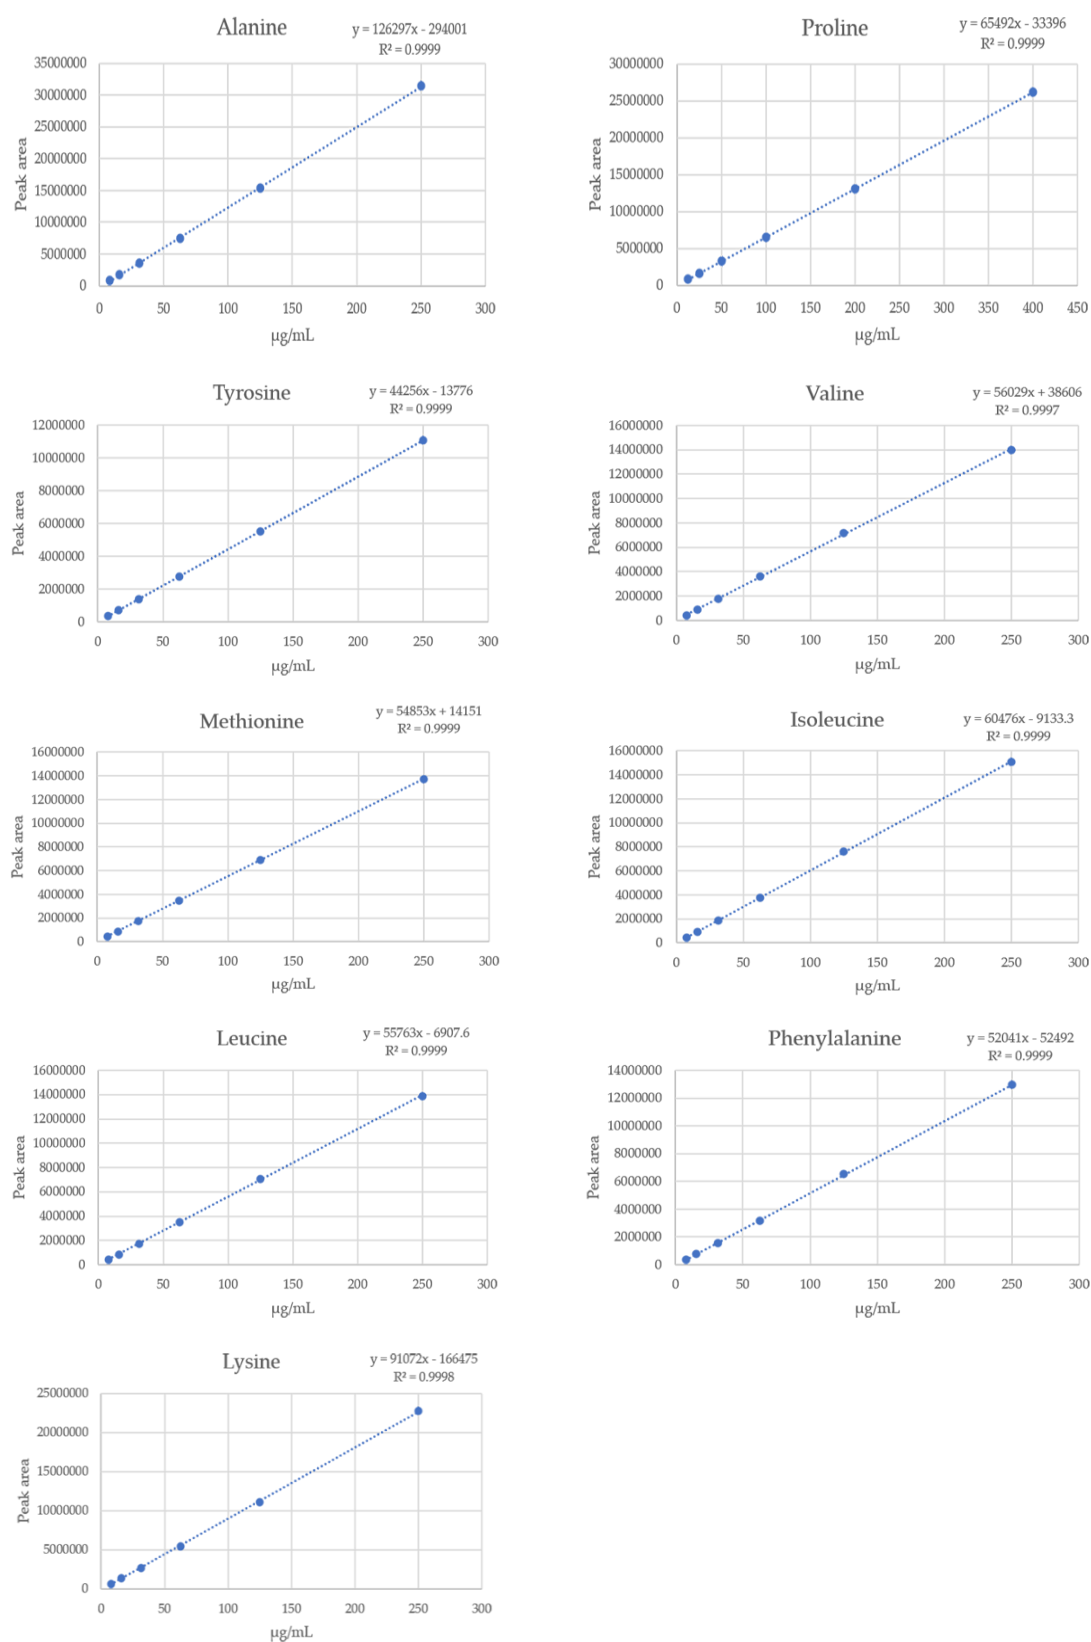

**Figure S2.** Standard curves used to calculate the individual amino acid concentrations through HPLC.

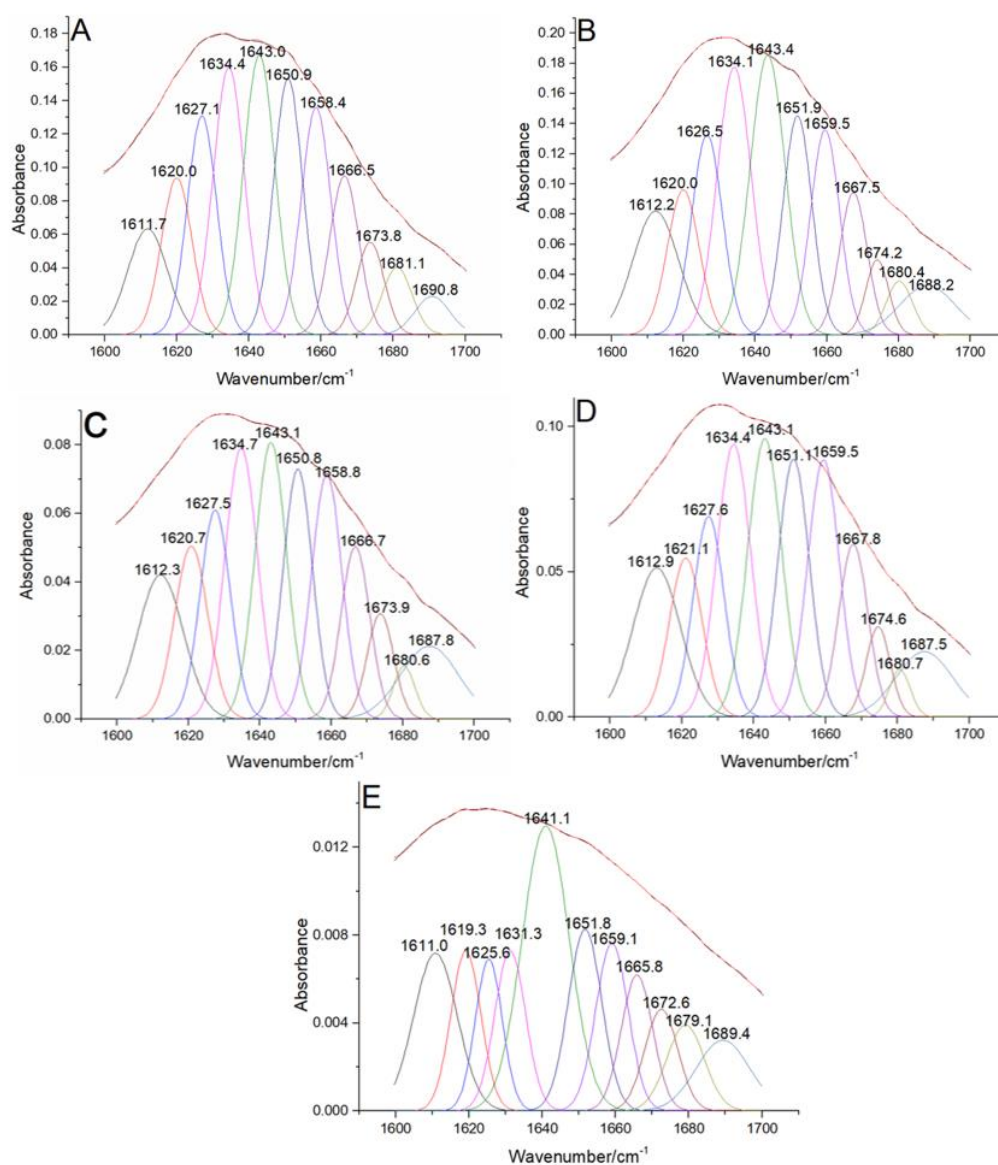

**Figure S3:** The Gaussian/Lorentz functions fitted amid I band (1600-1700cm<sup>-1</sup>) on ART-FTIR spectrum. Data were collected from FSB (A), 1-YSB (B), 5-YSB (C), 25-YSB (D) and TDSB (E).
